# Supplementary material for: Partitioning Transcript Variation in Drosophila: Abundance, Isoforms, and Alleles
Source: PubMed Central journal article supplement (PMC3276160; doi:10.1534/g3.111.000596), 2011-11-01
Supplement: supp_1.6.427_TableS4.pdf [file supp_1.6.427_TableS4.pdf]

**Table S4 Comparison between hybridization signal and sequence information (heterozygous genotypes)**

| Strain      | SNP pair | Hybridized arrays |             |                     |                     |
|-------------|----------|-------------------|-------------|---------------------|---------------------|
|             |          | C167.4            | <i>st e</i> | C167.4/ <i>st e</i> | C167.4/ <i>st e</i> |
| C167.4      | A        | 56.68%            | -           | 24.64%              | 29.31%              |
|             | C        | 78.27%            | -           | 62.53%              | 71.20%              |
|             | G        | 79.33%            | -           | 64.36%              | 71.78%              |
|             | T        | 57.46%            | -           | 27.46%              | 31.86%              |
| <i>st e</i> | A        | -                 | 85.53%      | 23.48%              | 20.18%              |
|             | C        | -                 | 95.43%      | 60.28%              | 62.39%              |
|             | G        | -                 | 95.38%      | 64.79%              | 66.50%              |
|             | T        | -                 | 84.40%      | 22.97%              | 18.26%              |

The table shows detailed comparison between hybridization signal and sequence information in heterozygous genotypes of  $F_1$  (n=2,769). The percent of probe sets where the probes corresponding to the target SNP alleles corresponds to the top rank (parental genotypes) or the top two ranks ( $F_1$  genotype) is reported separately for each base.
